# Supplementary material for: Targeted gene suppression by inducing de novo DNA methylation in the gene promoter
Source: PubMed Central journal article supplement (PMC4150861; doi:10.1186/1756-8935-7-20), 2014-08-18
Supplement: 1756-8935-7-20-S1.pdf [file 1756-8935-7-20-S1.pdf]

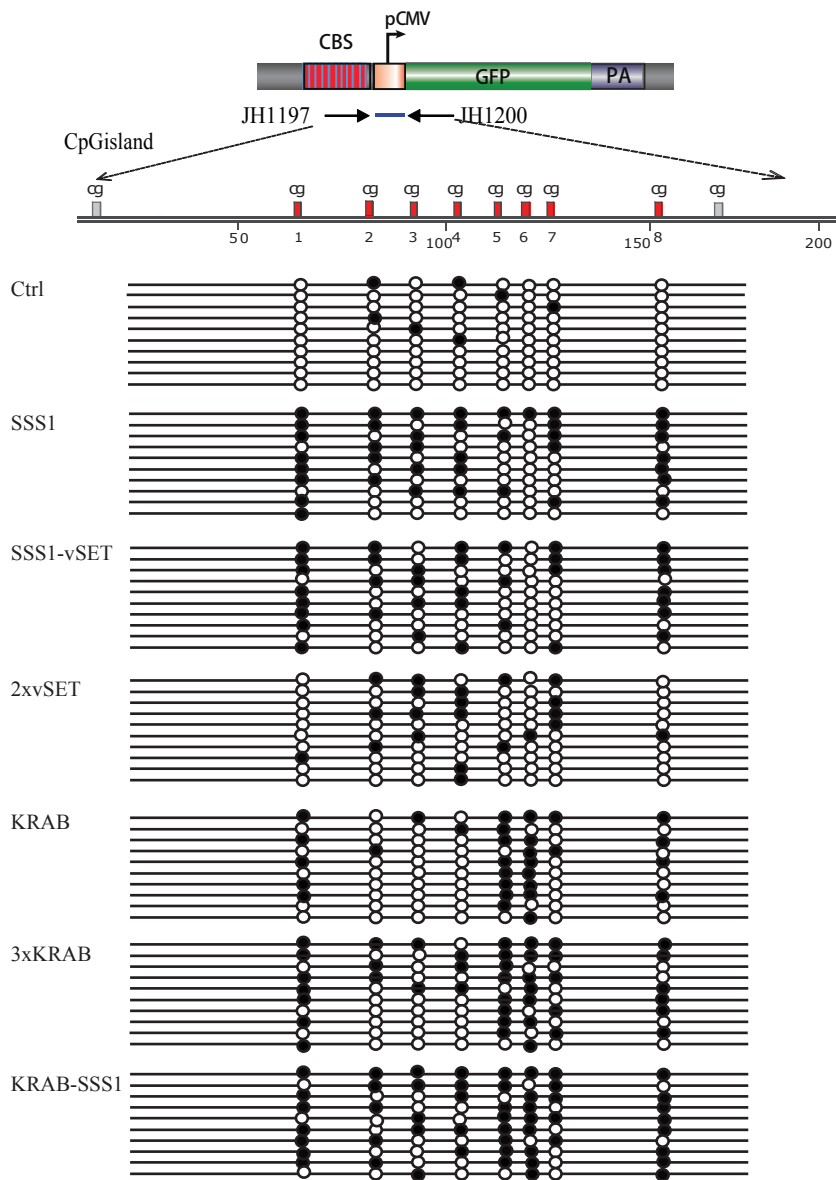

Additional file 1. Induced *de novo* DNA methylation in the CMV promoter
