# Supplementary material for: Targeted gene suppression by inducing de novo DNA methylation in the gene promoter
Source: PubMed Central journal article supplement (PMC4150861; doi:10.1186/1756-8935-7-20), 2014-08-18
Supplement: 1756-8935-7-20-S2.pdf [file 1756-8935-7-20-S2.pdf]

## **SUPPLEMENTAL MATERIALS**

### **Targeted gene suppression by inducing *de novo* DNA methylation in the gene promoter**

Ainu Ma, Hong Wang, Rui Guo, Yongxiang Wang, Wei Li, Jiuwei Cui, Guanjun Wang, Andrew R. Hoffman, Ji-Fan Hu

**Additional file 1. DNA methylation of the CMV promoter.** Stable clone cells were transiently transfected with synthetic suppressor vectors. Genomic DNA was extracted and treated by sodium bisulfite. Total genomic DNAs were amplified with PCR, cloned into pJet vector, and sequenced. Open circles: unmethylated CpGs; solid circles: methylated CpGs.

## Additional File 2

### PCR primers

| Gene                                  | Primer | Sequence (5'-3')             | °C |
|---------------------------------------|--------|------------------------------|----|
| <b>RT-PCR</b>                         |        |                              |    |
| Actin-F1                              | J880   | CAGGTCATCACCATTGGCAATGAGC    | 60 |
| Actin-R1                              | J881   | CGGATGTCCACGTCACACTTCATGA    | 60 |
| GcoGFP-F1                             | JH1137 | CCGCCATGGAGATCGAGTG          | 60 |
| GcoGFP-R1                             | JH1138 | GCCTTTGGTGCTCTTCATCTTG       | 60 |
| <b>Bisulfite DNA PCR</b>              |        |                              |    |
| pCMV-F1                               | JH1351 | TTTTAAAGATTGTGTATTTAAAGATTG  | 58 |
| pCMV-R1                               | JH1370 | AATACCAAACAAACTCCCATTAAC     | 58 |
| pCMV-F2                               | JH1197 | GGGATTTTTAAGTTTTTATTTTATTGA  | 60 |
| pCMV-R2                               | JH1200 | TCTAAAATCTTCTATAAAAATCAAACAA | 60 |
| <b>Methylation-specific PCR (MSP)</b> |        |                              |    |
| pCMV meth-F1                          | JH1351 | TTTTAAAGATTGTGTATTTAAAGATTG  | 62 |
| pCMV meth-R1                          | JH1536 | CCCGTAAATCAAACCGCTATCCACG    | 62 |
| pCMV unmeth-R1                        | JH1537 | TCCCCATAAATCAAACCACTATCCACA  | 62 |
| <b>ChIP PCR</b>                       |        |                              |    |
| pCMV-F1                               | JH1478 | GCGGTTTTGGCAGTACATCA         | 60 |
| pCMV-R1                               | JH1479 | GGGCGGAGTTGTTACGACAT         | 60 |
